# Supplementary material for: Hysteresis abated P2-type NaCoO2 cathode reveals highly reversible multiple phase transitions for high-rate sodium-ion batteries
Source: Royal Society of Chemistry journal article supplement (doi:10.1039/d1se00490e), 2021-01-01
Supplement: d1se00490e1.pdf [file d1se00490e1.pdf]

## Supporting Information

### Hysteresis Abated P2-type NaCoO<sub>2</sub> Cathode Reveals Highly Reversible Multiple Phase Transitions for High-Rate Sodium-ion Batteries

Venkata Rami Reddy Boddu<sup>1</sup>, Manikandan Palanisamy<sup>2\*</sup>, Lichchhavi Sinha<sup>1</sup>, Subhash Chand Yadav<sup>1</sup>, Vilas G. Pol<sup>1,2</sup> and Parasharam M. Shirage<sup>1\*</sup>

<sup>1</sup>Discipline of Metallurgy Engineering and Material Science, Indian Institute of Technology - Indore, Indore – 453552, India

<sup>2</sup>Davidson School of Chemical Engineering, Purdue University, West Lafayette, IN 47907, USA

\*Corresponding authors: Manikandan Palanisamy (manikandancy@gmail.com), and Parasharam M. Shirage (pmshirage@iiti.ac.in).

Figure S1

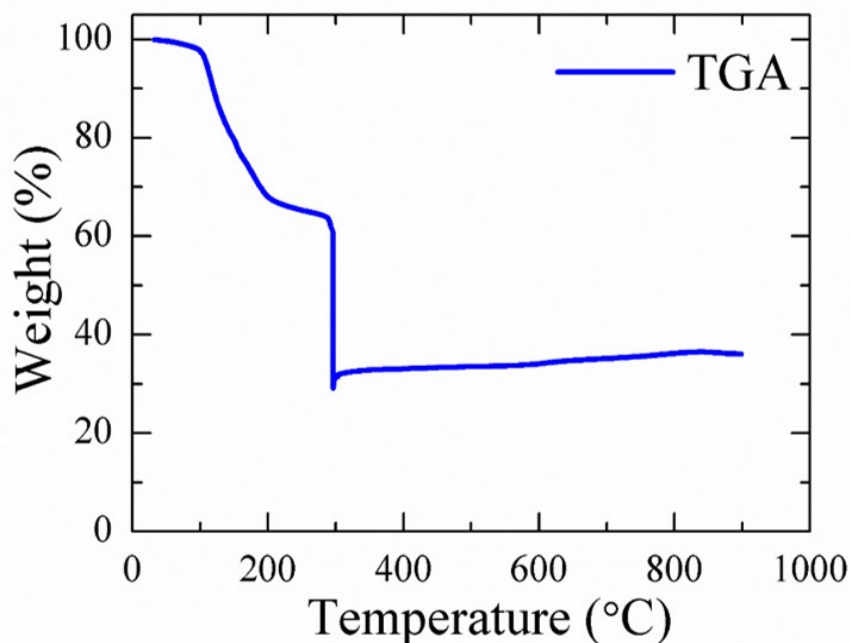

Figure S1. TG analysis for NaCoO<sub>2</sub> precursor.

**Table S1** Comparative study of crystal system parameters of NaCoO<sub>2</sub>.

| Sample Details | Unit cell parameters Calculated |              | Unit cell parameters from JCPDS File |              | JCPDS file number |
|----------------|---------------------------------|--------------|--------------------------------------|--------------|-------------------|
|                | <i>a</i> (Å)                    | <i>c</i> (Å) | <i>a</i> (Å)                         | <i>c</i> (Å) |                   |
| A1             | 2.8260                          | 10.9230      | 2.8330                               | 10.8800      | 00-030-1182       |
| A2             | 2.8269                          | 10.9323      | 2.8330                               | 10.8800      | 00-030-1182       |
| A3             | 2.8244                          | 10.9135      | 2.8330                               | 10.8800      | 00-030-1182       |
| A4             | 2.8223                          | 10.9124      | 2.8330                               | 10.8800      | 00-030-1182       |
| A5             | 2.8320                          | 10.9731      | 2.8330                               | 10.8800      | 00-030-1182       |
| A7             | 2.8282                          | 10.9506      | 2.8330                               | 10.8800      | 00-030-1182       |

**Table S2** Raman active vibration modes of NaCoO<sub>2</sub>.

| S. No | Active modes         | Raman active vibration modes (cm <sup>-1</sup> ) |     |     |     |     |     |
|-------|----------------------|--------------------------------------------------|-----|-----|-----|-----|-----|
|       |                      | A1                                               | A2  | A3  | A4  | A5  | A7  |
| 1     | E <sub>1g</sub> (O)  | 189                                              | 187 | 185 | 183 | 187 | 187 |
| 2     | E <sub>2g</sub> (O)  | 466                                              | 462 | 460 | 462 | 460 | 462 |
| 3     | E <sub>2g</sub> (Na) | 511                                              | 507 | 510 | 508 | 513 | 509 |
| 4     | E <sub>2g</sub> (Na) | 607                                              | 607 | 609 | 608 | 607 | 608 |
| 5     | A <sub>1g</sub> (O)  | 666                                              | 666 | 674 | 671 | 664 | 663 |

**Table S3** Comparative discharge performance of NaCoO<sub>2</sub>.

| Sample | Average discharge capacity after 10 cycles(mAh/g) |       |       |     |     |     |     | Discharge capacity retention at 0.1 C rate (mAh/g) |
|--------|---------------------------------------------------|-------|-------|-----|-----|-----|-----|----------------------------------------------------|
|        | 0.1 C                                             | 0.2 C | 0.5 C | 1 C | 2 C | 3 C | 5 C |                                                    |
| A1     | 76                                                | 74    | 71    | 70  | 60  | 53  | 49  | 74                                                 |
| A2     | 90                                                | 89    | 82    | 73  | 68  | 64  | 52  | 90                                                 |
| A3     | 80                                                | 73    | 70    | 68  | 60  | 50  | 40  | 78                                                 |
| A4     | 82                                                | 77    | 72    | 69  | 61  | 50  | 41  | 79                                                 |
| A5     | 83                                                | 83    | 78    | 70  | 64  | 58  | 44  | 80                                                 |
| A7     | 100                                               | 99    | 93    | 90  | 83  | 75  | 69  | 98                                                 |
